# Supplementary material
Source: publisher site journal article supplement (https://www.dovepress.com/article/supplementary_file/489922/Supplementary%20materials_1.docx)
Supplement: Supplementary file 1 [file Supplementary%20materials_1.docx]

| #include <TMC2209.h>  // This code uses the TMC2209 library by Peter Polidoro  // https://github.com/janelia-arduino/TMC2209/blob/main/README.md  // This code will not work on Arduino boards without HardwareSerial ports, // such as the Uno, Nano, and Mini.  // Connect the TMC2209 respective UART pins to the TX1 and RX1 headers  HardwareSerial & serial_stream = Serial1;  // This variable controls the number of microsteps in the form of 2^MICROSTEPS const uint8_t MICROSTEPS = 4;  // This variable ‘VELOCITY’ is the number of microsteps per period const int32_t VELOCITY = 6;  // This variable ‘T’ is the time between microsteps in microseconds int T;  // This variable ‘SWITCHER’ should be set to 1 if the microsteps per period is rounded up or 0 if it is rounded down  int8_t SWITCHER = 1;  // This variable ‘TIMER’ is repeatedly assigned the time since the start of the  infusion  long int TIMER;  // Instantiate TMC2209 TMC2209 driver;  void setup()  { driver.setup(serial_stream); driver.setRunCurrent(100); driver.enableCoolStep(); driver.enable();  // Set the number of microsteps per step  driver.setMicrostepsPerStepPowerOfTwo(MICROSTEPS);  // Start motor movement at VELOCITY driver.moveAtVelocity(VELOCITY);  // Retrieve the inter-microstep period in microseconds  T = 256 * driver.getInterstepDuration() / 12;  // Set timer to start of program TIMER = micros();  }  void loop()  {  // Delete the loop() contents to remove algorithm // Calculate the time elapsed since the last switch uint32_t DIFF = micros() - TIMER;  // Alternate the number of microsteps per period by +/- 1 if (DIFF >= T){ | |
| --- | --- |
| } | if (SWITCHER == 1){SWITCHER = -1;} else if (SWITCHER == -1){SWITCHER = 1;} VELOCITY += SWITCHER;  driver.moveAtVelocity(VELOCITY);  T = 256 * driver.getInterstepDuration() / 12;  TIMER = micros();  } |

Listing 1: Test Code with Algorithm Applied
